# Supplementary material for: Listening panel agreement and characteristics of lung sounds digitally recorded from children aged 1–59 months enrolled in the Pneumonia Etiology Research for Child Health (PERCH) case–control study
Source: PubMed Central journal article supplement (PMC5531306; doi:10.1136/bmjresp-2017-000193), 2017-06-30
Supplement: bmjresp-2017-000193supp001.pdf [file bmjresp-2017-000193supp001.pdf]

**Supplementary Table 1.** Digital lung sound examination agreement **between** primary listeners in ARI and non-ARI **controls**, stratified by listener<sup>1</sup>

| Between listener agreement            |                                   |                   | Listener (N = number of recordings interpreted by each panelist) |                    |                    |                    |                    |                    |                    |                    |
|---------------------------------------|-----------------------------------|-------------------|------------------------------------------------------------------|--------------------|--------------------|--------------------|--------------------|--------------------|--------------------|--------------------|
| Dichotomous lung examination group    |                                   | Overall (N=278)   | Listener #1 (N=73)                                               | Listener #2 (N=67) | Listener #3 (N=68) | Listener #4 (N=74) | Listener #5 (N=63) | Listener #6 (N=61) | Listener #7 (N=78) | Listener #8 (N=72) |
| <b>Abnormal or normal<sup>2</sup></b> | <b>Agreement, n (%)</b>           | 194 (69.8)        | 44 (60.2)                                                        | 52 (77.6)          | 50 (73.6)          | 56 (75.6)          | 46 (73.0)          | 47 (77.0)          | 40 (51.2)          | 53 (73.6)          |
|                                       | <b>Kappa statistic (95% CI)</b>   | 0.21 (0.13, 0.30) | 0.13                                                             | 0.27               | 0.35               | 0.29               | 0.03               | 0.35               | 0.06               | 0.22               |
|                                       | <b>PABAK (95% CI)<sup>3</sup></b> | 0.40 (0.32, 0.47) | 0.21                                                             | 0.55               | 0.47               | 0.51               | 0.46               | 0.54               | 0.03               | 0.47               |
| <b>Crackle or no crackle</b>          | <b>Agreement, n/N (%)</b>         | 229 (82.4)        | 50 (68.4)                                                        | 61 (91.0)          | 57 (83.8)          | 65 (87.8)          | 55 (87.4)          | 51 (83.6)          | 60 (77.0)          | 59 (82.0)          |
|                                       | <b>Kappa statistic (95% CI)</b>   | 0.21 (0.11, 0.32) | 0.16                                                             | 0.21               | 0.26               | 0.34               | -0.03              | 0.09               | 0.26               | 0.21               |
|                                       | <b>PABAK (95% CI)<sup>4</sup></b> | 0.65 (0.58, 0.71) | 0.37                                                             | 0.82               | 0.68               | 0.76               | 0.67               | 0.67               | 0.54               | 0.64               |
| <b>Wheeze or no wheeze</b>            | <b>Agreement, n/N (%)</b>         | 205 (73.8)        | 55 (75.4)                                                        | 54 (80.6)          | 50 (73.6)          | 57 (77.0)          | 51 (81.0)          | 50 (82.0)          | 36 (46.2)          | 57 (79.2)          |
|                                       | <b>Kappa statistic (95% CI)</b>   | 0.14 (0.05-0.23)  | 0.16                                                             | 0.32               | 0.21               | 0.19               | 0.14               | 0.37               | -0.10              | 0.00               |
|                                       | <b>PABAK (95% CI)<sup>5</sup></b> | 0.48 (0.40, 0.55) | 0.51                                                             | 0.61               | 0.47               | 0.54               | 0.62               | 0.64               | -0.08              | 0.58               |

ARI indicates acute respiratory infection; CI, confidence interval; PABAK, prevalence adjusted, bias adjusted kappa statistic.

<sup>1</sup>Excludes 23/301 uninterpretable primary listener lung examination results. Primary listeners were the first two listeners randomly assigned to interpret a lung sound examination.

<sup>2</sup>Crackle and/or wheeze (abnormal) or no crackle and/or wheeze (normal)

<sup>3</sup>Prevalence index -0.48, Bias index -0.03

<sup>4</sup>Prevalence index -0.75, Bias index 0.05

<sup>5</sup>Prevalence index -0.63, Bias index -0.08
