# Supplementary material for: Listening panel agreement and characteristics of lung sounds digitally recorded from children aged 1–59 months enrolled in the Pneumonia Etiology Research for Child Health (PERCH) case–control study
Source: PubMed Central journal article supplement (PMC5531306; doi:10.1136/bmjresp-2017-000193), 2017-06-30
Supplement: bmjresp-2017-000193supp002.pdf [file bmjresp-2017-000193supp002.pdf]

**Supplementary Table 2.** Factors associated with primary listener disagreement for cases and controls, stratified by lung examination result<sup>1</sup>

| Dichotomous lung examination group | Characteristic                             | Disagreement, n/N (%) | OR (95% CI)       | p value | Adjusted <sup>2</sup> OR (95% CI) | p value |
|------------------------------------|--------------------------------------------|-----------------------|-------------------|---------|-----------------------------------|---------|
| Crackle or no crackle              | All cases and controls (N=987)             | 258 (26.1%)           | --                | --      | --                                | --      |
|                                    | Cases only (N=709)                         | 209 (29.5%)           | 1.95 (1.38, 2.77) | <0.001  | 1.37 (0.82, 2.30)                 | 0.23    |
|                                    | Controls only (N=278)                      | 49 (17.6%)            | --                | --      | --                                | --      |
|                                    | Age 1-11 months (N=601)                    | 154 (25.6%)           | 0.93 (0.70, 1.25) | 0.65    | --                                | --      |
|                                    | Age 12-59 months (N=386)                   | 104 (26.9%)           | --                | --      | --                                | --      |
|                                    | Tachypnea <sup>3</sup> (N=592)             | 186 (31.4%)           | 2.09 (1.52, 2.85) | <0.001  | 1.76 (1.15, 2.67)                 | <0.01   |
|                                    | No tachypnea (N=383)                       | 69 (18.0%)            | --                | --      | --                                | --      |
|                                    | ≥3 uninterpretable chest positions (N=344) | 91 (26.5%)            | 1.03 (0.76, 1.38) | 0.87    | --                                | --      |
|                                    | <3 uninterpretable chest positions (N=643) | 167 (26.0%)           | --                | --      | --                                | --      |
|                                    | Intermittent crying (N=514)                | 138 (26.9%)           | 1.08 (0.81, 1.44) | 0.60    | --                                | --      |
|                                    | No intermittent crying (473)               | 120 (25.4%)           | --                | --      | --                                | --      |
|                                    | Upper airway noises (N=607)                | 192 (31.6%)           | 2.20 (1.61, 3.02) | <0.001  | 2.15 (1.55, 2.99)                 | <0.001  |
|                                    | No upper airway noises                     | 66 (17.4%)            | --                | --      | --                                | --      |

|                                           |                                                   |                              |                      |                |                                         |                |
|-------------------------------------------|---------------------------------------------------|------------------------------|----------------------|----------------|-----------------------------------------|----------------|
|                                           | (N=380)                                           |                              |                      |                |                                         |                |
|                                           | <b>PERCH site</b>                                 | --                           | --                   | <0.001         | --                                      | <0.001         |
|                                           | <b>Thailand (N=227)</b>                           | 45 (19.8%)                   | 1.00                 | --             | --                                      | --             |
|                                           | <b>Bangladesh (N=165)</b>                         | 53 (32.1%)                   | 1.91 (1.21,<br>3.04) | --             | --                                      | --             |
|                                           | <b>Kenya (N=120)</b>                              | 38 (31.7%)                   | 1.87 (1.13,<br>3.10) | --             | --                                      | --             |
|                                           | <b>The Gambia (N=122)</b>                         | 49 (40.2%)                   | 2.72 (1.67,<br>4.42) | --             | --                                      | --             |
|                                           | <b>Zambia (N=258)</b>                             | 50 (19.4%)                   | 0.97 (0.62,<br>1.52) | --             | --                                      | --             |
|                                           | <b>South Africa (N=95)</b>                        | 23 (24.2%)                   | 1.29 (0.73,<br>2.29) | --             | --                                      | --             |
| <b>Dichotomous lung examination group</b> | <b>Characteristic</b>                             | <b>Disagreement, n/N (%)</b> | <b>OR (95% CI)</b>   | <b>p value</b> | <b>Adjusted<sup>2</sup> OR (95% CI)</b> | <b>p value</b> |
| <b>Wheeze or no wheeze</b>                | <b>All cases and controls (N=987)</b>             | 267 (27.1%)                  | --                   | --             | --                                      | --             |
|                                           | <b>Cases only (N=709)</b>                         | 194 (27.4%)                  | 1.06 (0.77,<br>1.45) | 0.73           | --                                      | --             |
|                                           | <b>Controls only (N=278)</b>                      | 73 (26.3%)                   | --                   | --             | --                                      | --             |
|                                           | <b>Age 1-11 months (N=601)</b>                    | 169 (28.1%)                  | 1.15 (0.86,<br>1.54) | 0.35           | --                                      | --             |
|                                           | <b>Age 12-59 months (N=386)</b>                   | 98 (25.4%)                   | --                   | --             | --                                      | --             |
|                                           | <b>Tachypnea<sup>3</sup> (N=592)</b>              | 161 (27.2%)                  | 1.07 (0.80,<br>1.44) | 0.64           | --                                      | --             |
|                                           | <b>No tachypnea (N=383)</b>                       | 99 (25.9%)                   | --                   | --             | --                                      | --             |
|                                           | <b>≥3 uninterpretable chest positions (N=344)</b> | 101 (29.4%)                  | 1.19 (0.89,<br>1.60) | 0.23           | --                                      | --             |

|  |                                                      |             |                   |        |                   |        |
|--|------------------------------------------------------|-------------|-------------------|--------|-------------------|--------|
|  | <b>&lt;3 uninterpretable chest positions (N=643)</b> | 166 (25.8%) | --                | --     | --                | --     |
|  | <b>Intermittent crying (N=514)</b>                   | 161 (31.3%) | 1.58 (1.19, 2.10) | <0.01  | 1.62 (1.20, 2.18) | <0.01  |
|  | <b>No intermittent crying (473)</b>                  | 106 (22.4%) | --                | --     | --                | --     |
|  | <b>Upper airway noises (N=607)</b>                   | 209 (34.4%) | 2.92 (2.11, 4.04) | <0.001 | 2.95 (2.12, 4.11) | <0.001 |
|  | <b>No upper airway noises (N=380)</b>                | 58 (15.3%)  | --                | --     | --                | --     |
|  | <b>PERCH site</b>                                    | --          | --                | 0.10   | --                | 0.21   |

OR indicates Odds Ratio; CI, confidence interval; PERCH, Pneumonia Etiology Research for Child Health.

<sup>1</sup>Excludes uninterpretable primary listener lung examination results in both cases and controls. 83/792 cases and 23/301 controls were excluded. Primary listeners were the first two listeners randomly assigned to interpret a lung sound examination.

<sup>2</sup>Adjusted for all characteristics associated with disagreement at the significance level of 0.20.

<sup>3</sup>Tachypnea defined as follows: <2 months: >60 breaths/minute; 2-11 months: >50 breaths/minute; 12-59 months: >40 breaths/minute
